# Supplementary material for: Design, synthesis, and structural characterization of the first dithienocyclopentacarbazole-based n-type organic semiconductor and its application in non-fullerene polymer solar cells
Source: Royal Society of Chemistry journal article supplement (doi:10.1039/c7ta01143a), 2017-01-01
Supplement: c7ta01143a1.pdf [file c7ta01143a1.pdf]

## Supporting Information

# Design, Synthesis, and Structural Characterization of the First Dithienocyclopentacarbazole-Based *n*-Type Organic Semiconductor and its Application in Non-Fullerene Polymer Solar Cells

Qunfang Cao<sup>a,#</sup>, Wentao Xiong<sup>a,#</sup>, Huajie Chen<sup>a,\*</sup>, Guosheng Cai<sup>a</sup>, Guo Wang<sup>a</sup>, Liping Zheng<sup>a</sup>,  
Yanming Sun<sup>b,\*</sup>

<sup>a</sup>Key Laboratory of Advanced Functional Polymeric Materials of College of Hunan Province,  
College of Chemistry, Xiangtan University, Xiangtan 411105, P. R. China

<sup>b</sup>Heeger Beijing Research and Development Center, School of Chemistry and Environment, Beihang  
University, Beijing 100191, P. R. China

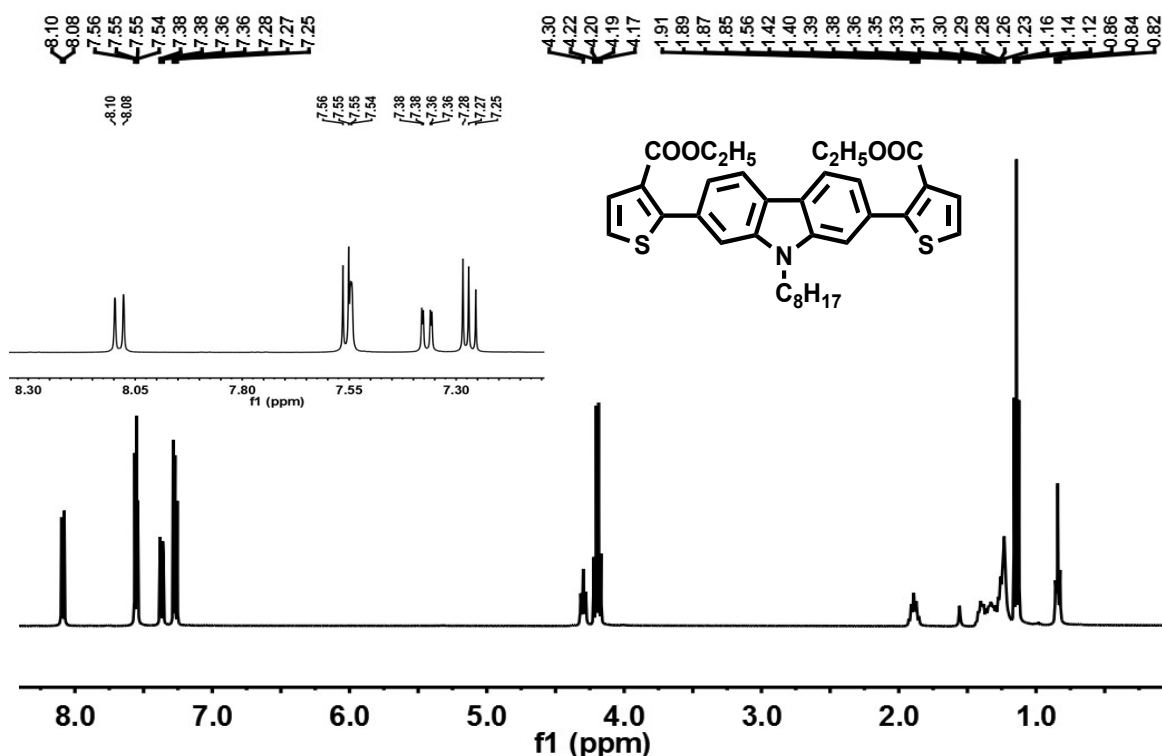

Figure S1. <sup>1</sup>H NMR spectra of compound 2.

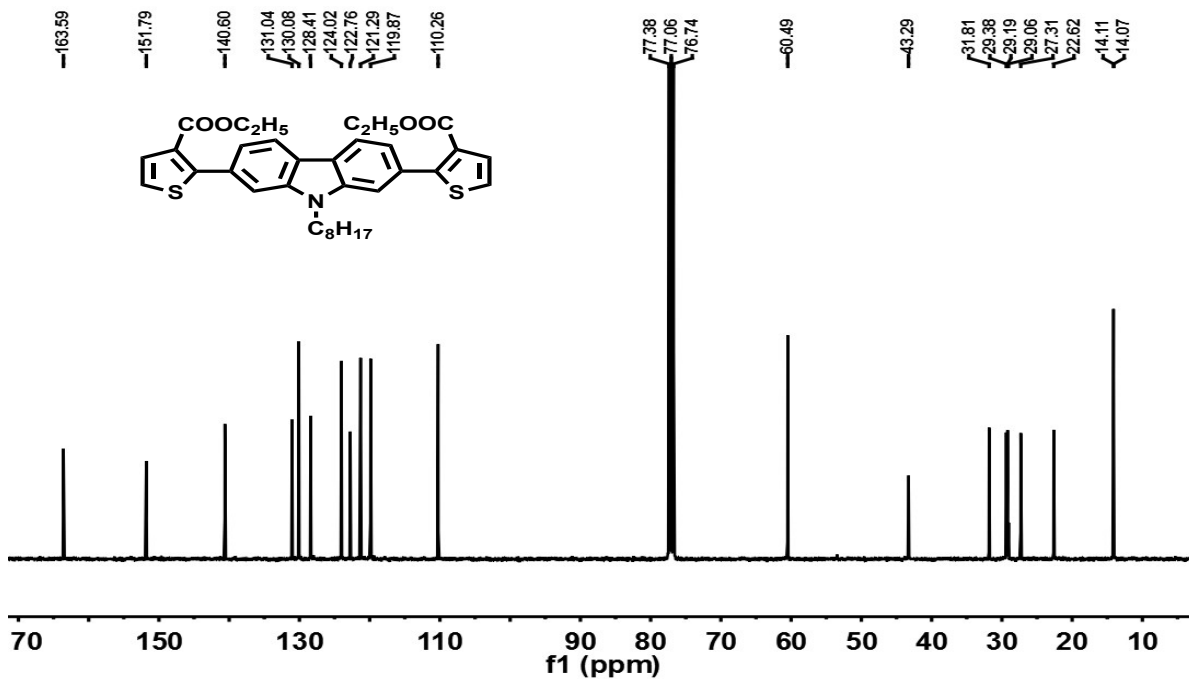

Figure S2.  $^{13}\text{C}$  NMR spectra of compound 2.

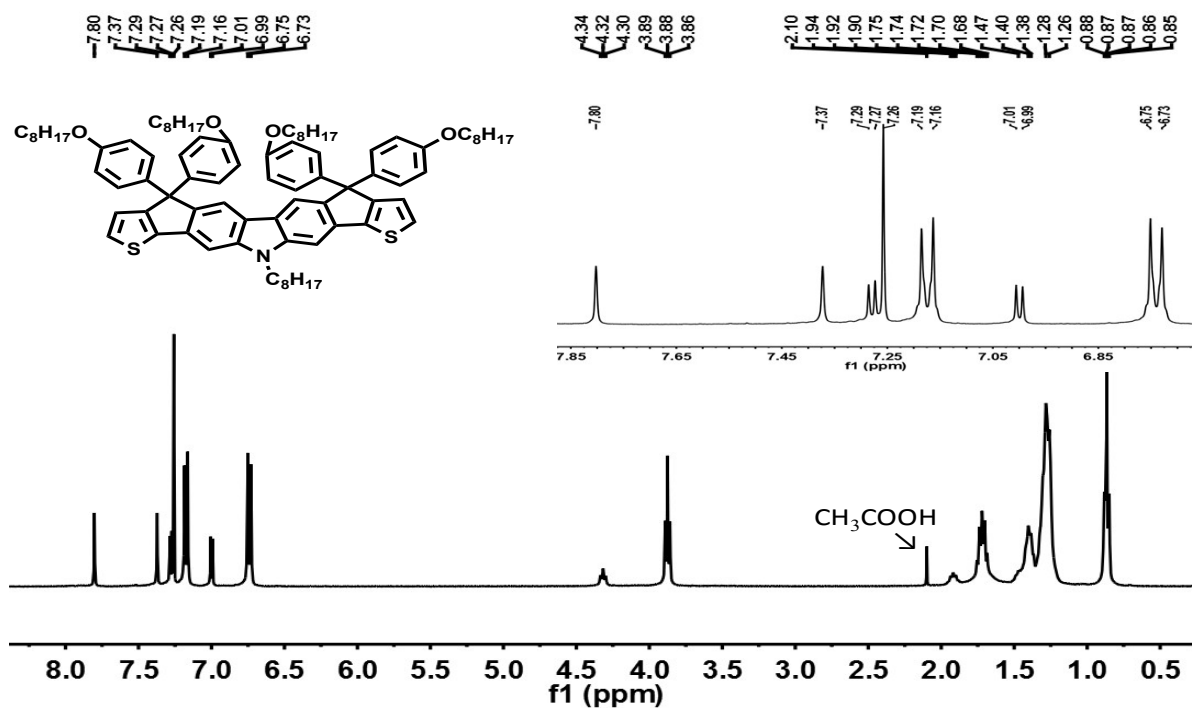

Figure S3.  $^1\text{H}$  NMR spectra of compound DTCC.

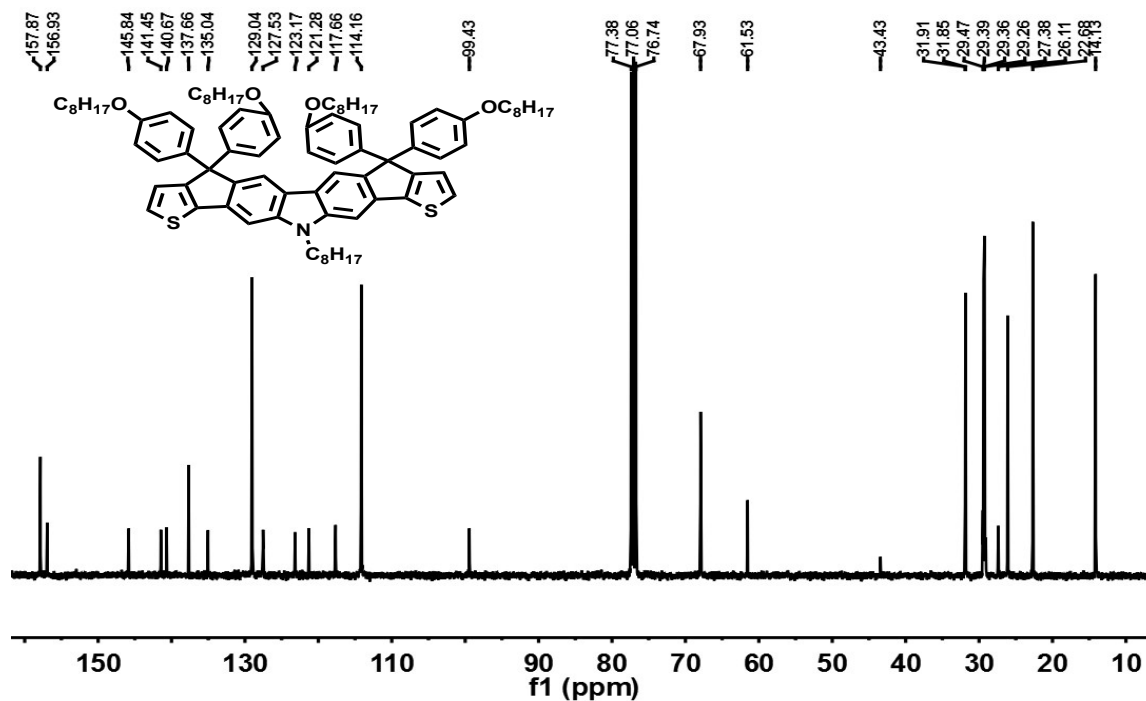

Figure S4. <sup>13</sup>C NMR spectra of compound DTCC.

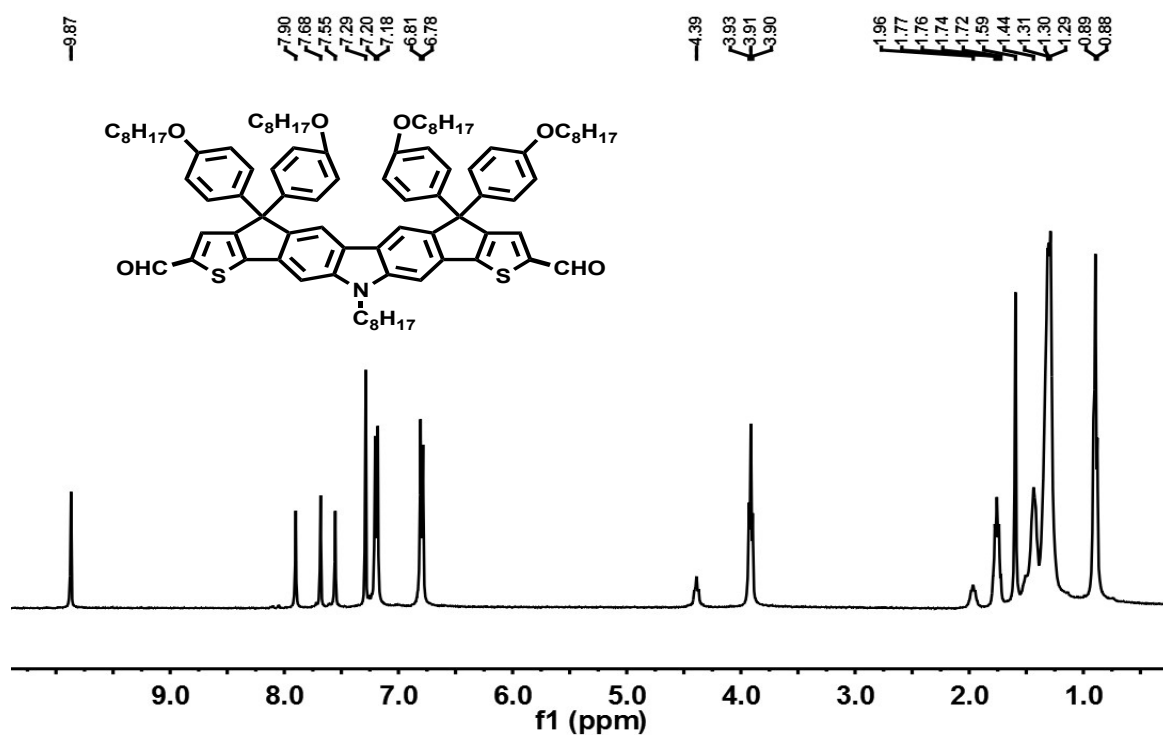

Figure S5. <sup>1</sup>H NMR spectra of compound DTCC-CHO.

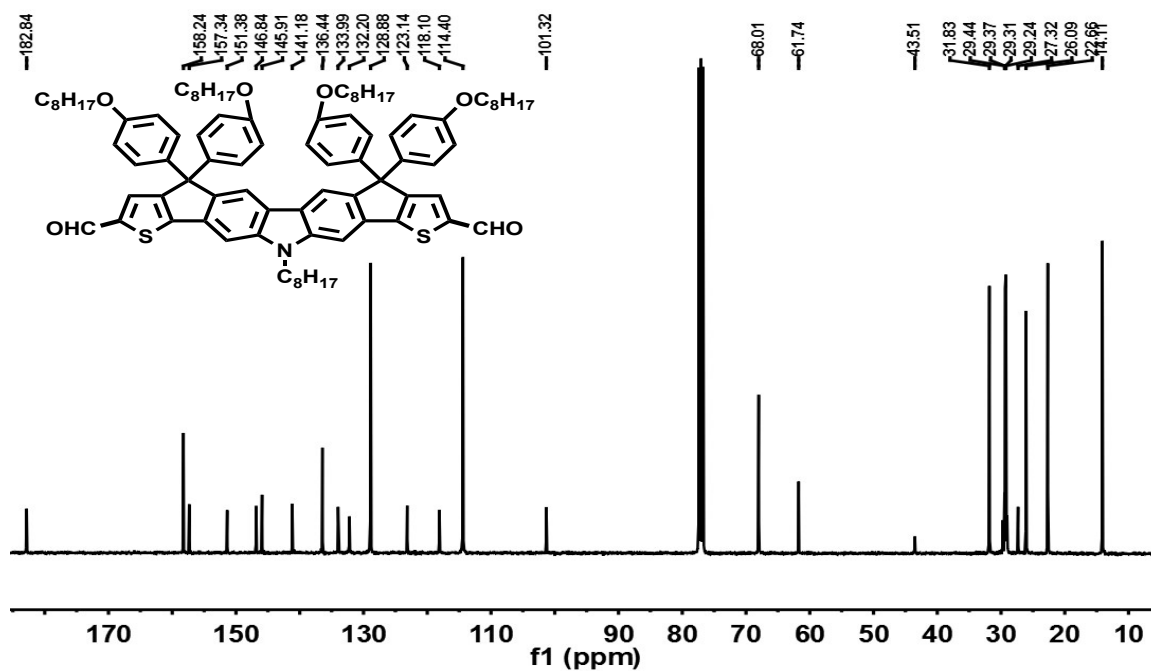

Figure S6.  $^{13}\text{C}$  NMR spectra of compound DTCC-CHO.

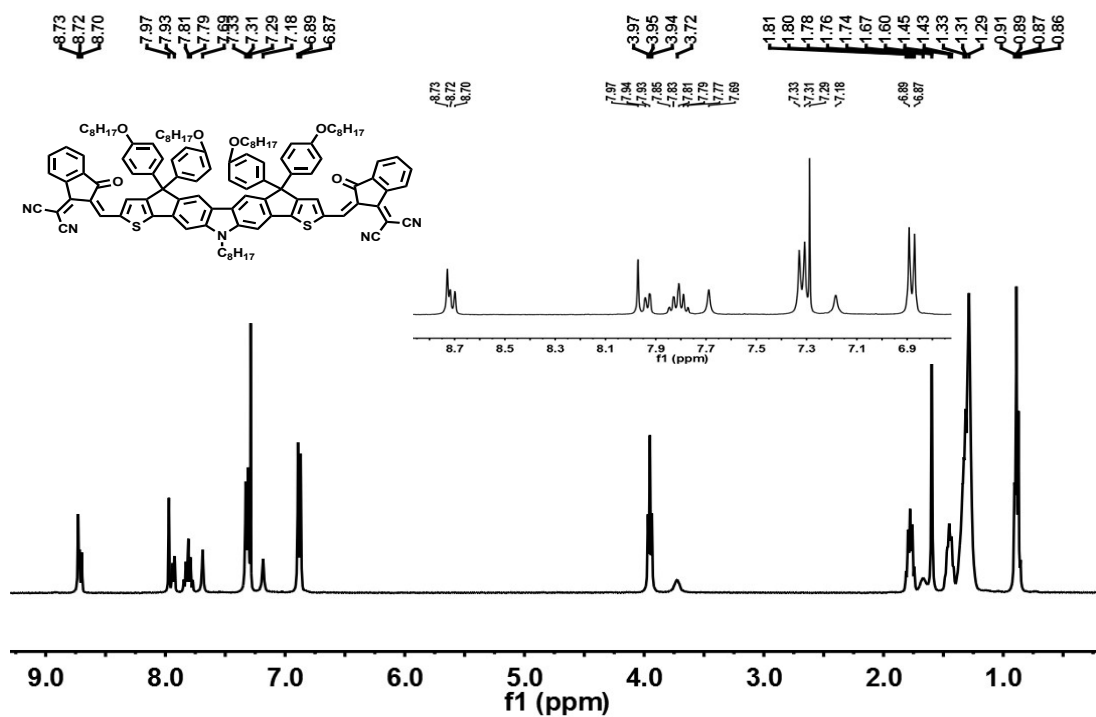

Figure S7.  $^1\text{H}$  NMR spectra of compound DTCC-IC.

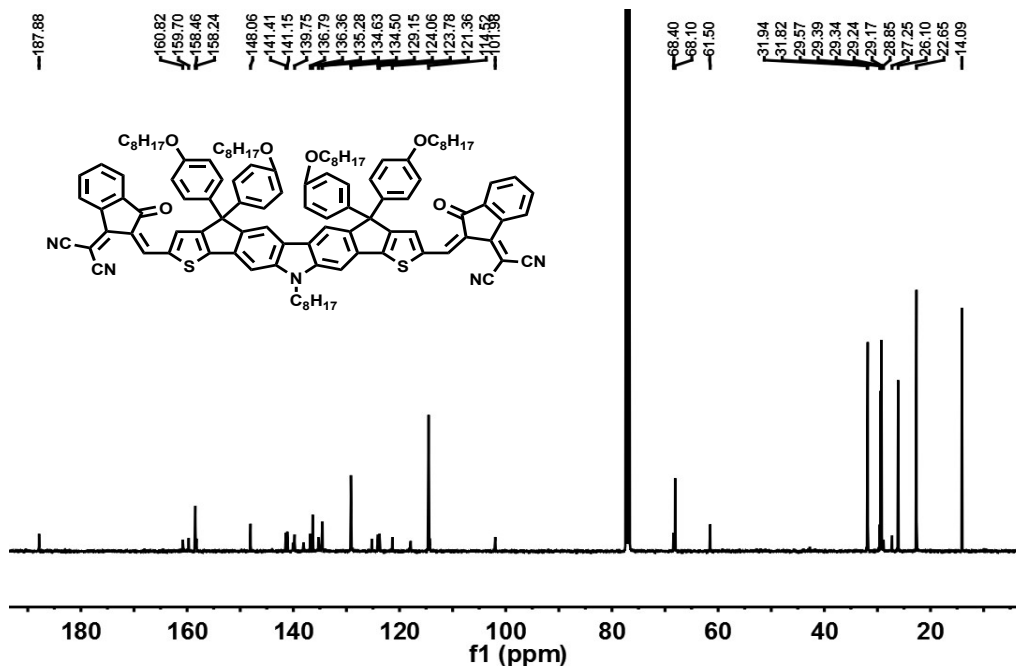

Figure S8.  $^{13}\text{C}$  NMR spectra of compound DTCC-IC.

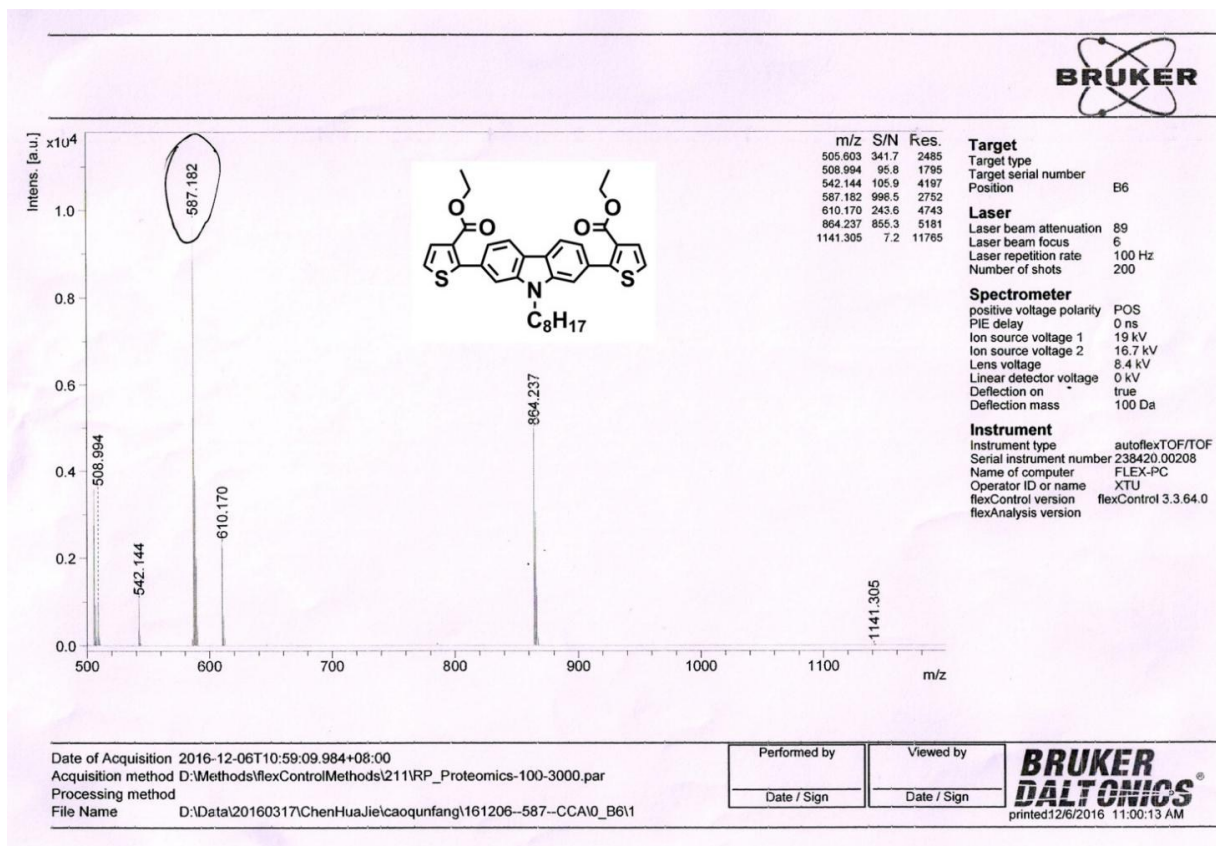

Figure S9. MADI-TOF of compound 2.

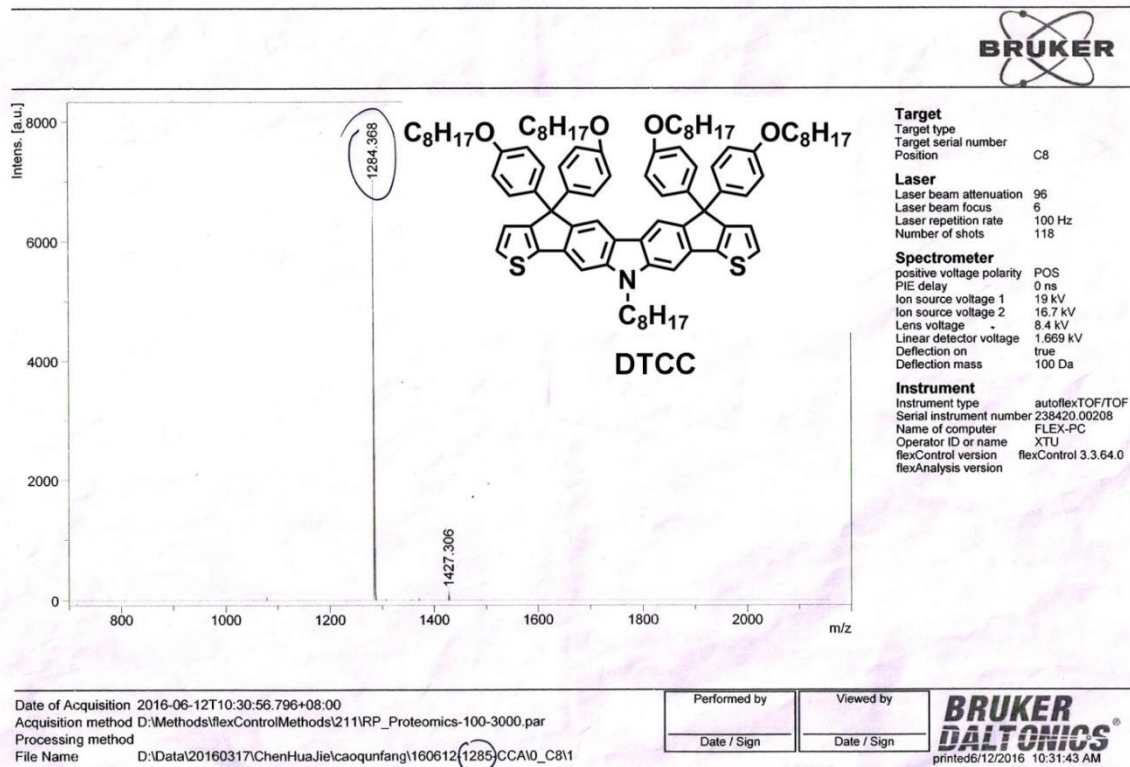

**Figure S10.** MADI-TOF of compound DTCC.

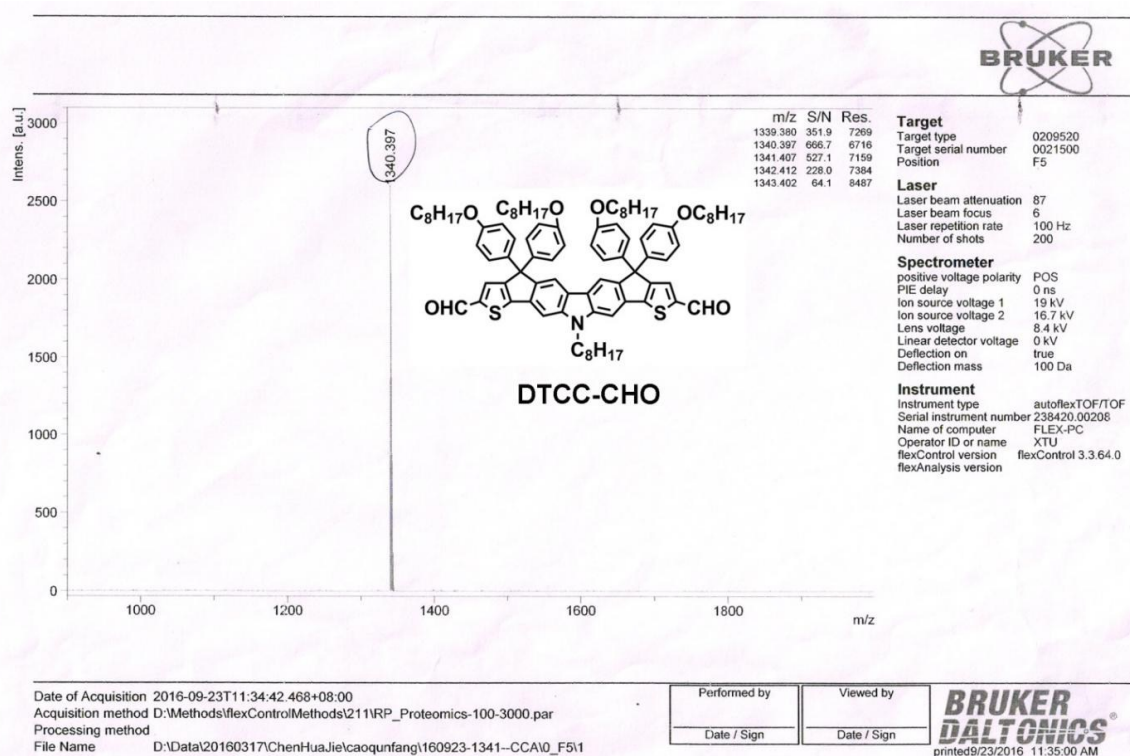

**Figure S11.** MADI-TOF of compound DTCC-CHO.

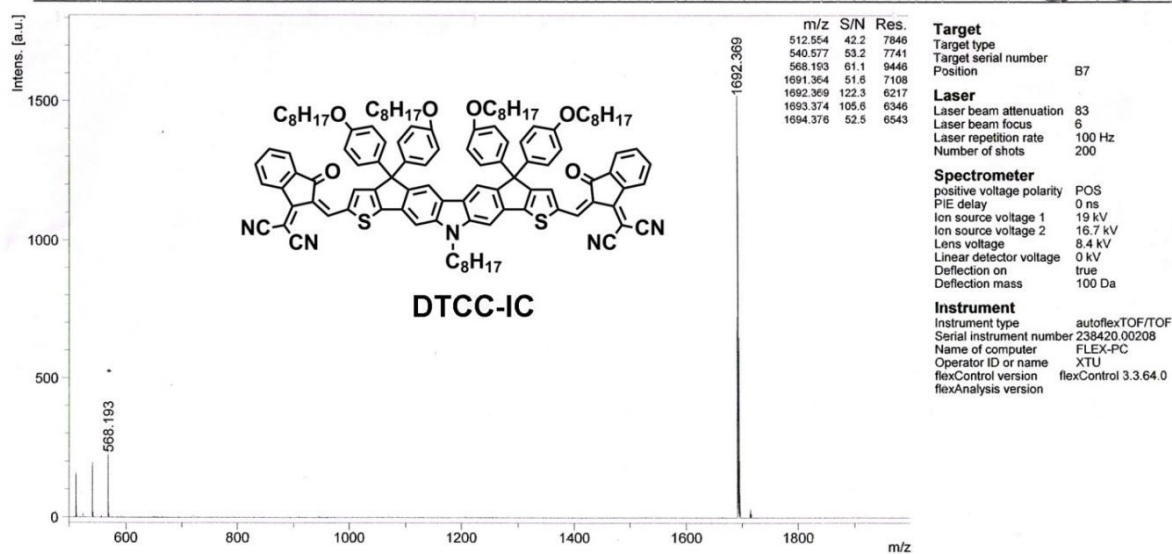

Date of Acquisition 2016-12-06T11:01:58.828+08:00  
 Acquisition method D:\Methods\flexControlMethods\211\RP\_Proteomics-100-3000.par  
 Processing method  
 File Name D:\Data\20160317\ChenHuaJie\caoqunfang\161206-1693-CCA0\_B71

|              |             |
|--------------|-------------|
| Performed by | Viewed by   |
| Date / Sign  | Date / Sign |

**BRUKER**  
**DALTONICS**  
 printed12/6/2016 11:02:59 AM

Figure S12. MADI-TOF of compound DTCC-IC.

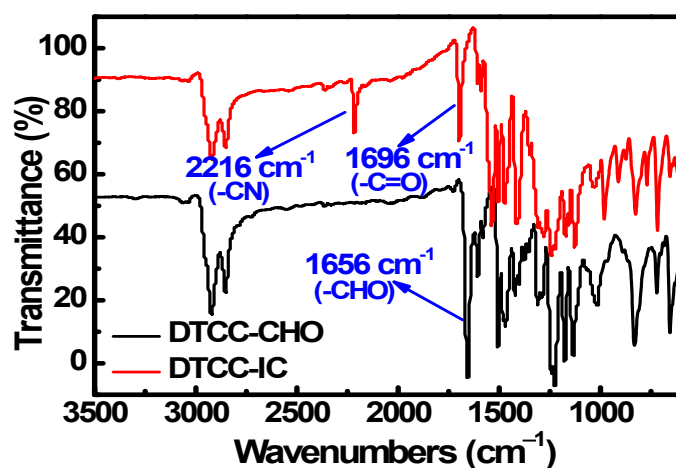

Figure S13. FTIR spectra of the DTCC-CHO and DTCC-IC samples.

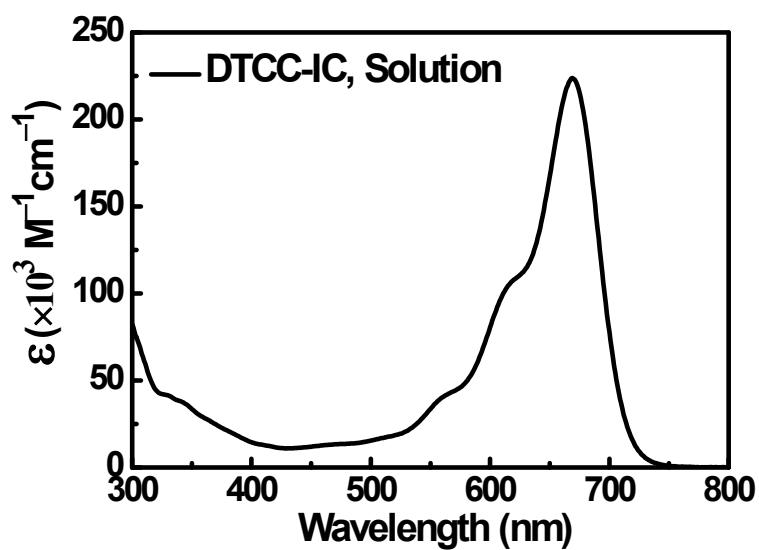

**Figure S14.** Molar absorption coefficient of the DTCC-IC in chloroform solution.

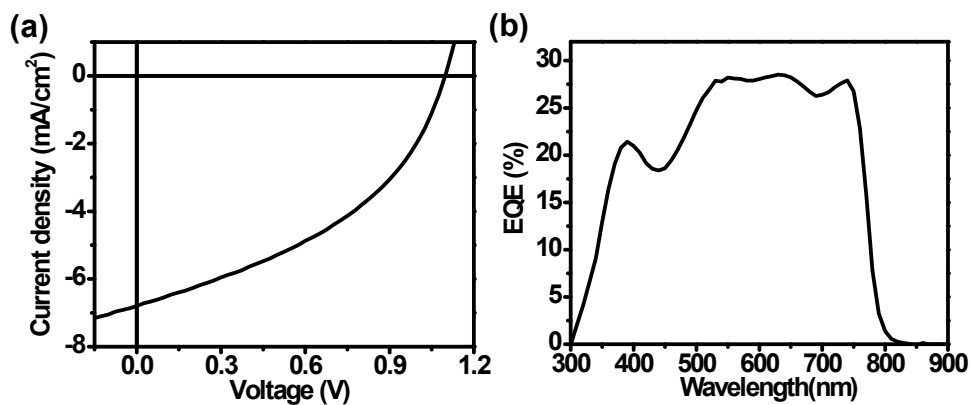

**Figure S15.** a)  $J$ - $V$  curves of OSC devices based on the PBT1-EH:DTCC-IC blends and b) the corresponding EQE spectrum.
